# Supplementary material
Source: bioRxiv or medRxiv preprint supplement (https://medrxiv.org/highwire/filestream/91416/field_highwire_adjunct_files/0/2020.07.27.20163147-1.pdf)
Supplement: Supplementary file [file 2020.07.27.20163147-1.pdf]

Preheat Nuclease Free water to 95C for elution

4X sets of labeled tubes (2X from the 2ml tubes provided in the kit and an additional 2X 1.5ml eppendorf tubes)

1. To **200ul** of sample add **200ul** ATL Buffer and **Vortex**
2. **Incubate** 56C **10** min
3. Add **200ul** 100% EtOH
4. **Pipette** mixture into a DNeasy spin column and place in a 2ml collection tube
5. **Centrifuge** **>6,000** rcf (g) for **1** min at RT
6. Discard collection tube and replace with a fresh collection tube
7. Add **500ul** AW1 into spin column
8. **Centrifuge** **>60,000** rcf (g) for **1** min at RT
9. Discard collection tube and replace with a fresh collection tube
10. Add **500ul** AW2 into spin column
11. **Centrifuge** **20,000** rcf for **1** min
12. Discard collection tube and replace with a clean 1.5ml low-bind eppendorf tube
13. Add **30ul** Nuclease Free Water into spin column
14. Incubate at RT for 1 min
15. Centrifuge **>6,000** rcf for **1** min
16. Quantify using Qubit and Nanodrop
17. Store at -20C
